# Supplementary material for: Polymer ligands induced remarkable spectral shifts in all-inorganic lead halide perovskite nanocrystals
Source: Royal Society of Chemistry journal article supplement (doi:10.1039/d0tc01822h), 2020-01-01
Supplement: d0tc01822h1.pdf [file d0tc01822h1.pdf]

## **Polymer Ligands Induced Remarkable Spectral Shifts in All-Inorganic Lead Halide Perovskite Nanocrystals**

*Hui Xiao,<sup>a,b</sup> Yi Wei,<sup>a,b</sup> Peipei Dang,<sup>a,b</sup> Shuang Liang,<sup>a,b</sup> Ziyong Cheng,<sup>\*a</sup> Guogang Li,<sup>\*c</sup> and  
Jun Lin <sup>\*a</sup>*

- a. State Key Laboratory of Rare Earth Resource Utilization, Changchun Institute of Applied Chemistry, Chinese Academy of Sciences, 5625 Renmin Street, Changchun 130022, China E-mail: [jlin@ciac.ac.cn](mailto:jlin@ciac.ac.cn), [zycheng@ciac.ac.cn](mailto:zycheng@ciac.ac.cn)
- b. University of Science and Technology of China, Hefei 230026, China
- c. Engineering Research Center of Nano-Geomaterials of Ministry of Education, Faculty of Materials Science and Chemistry, China University of Geosciences, Wuhan 430074, China  
Email: [ggli@cug.edu.cn](mailto:ggli@cug.edu.cn)

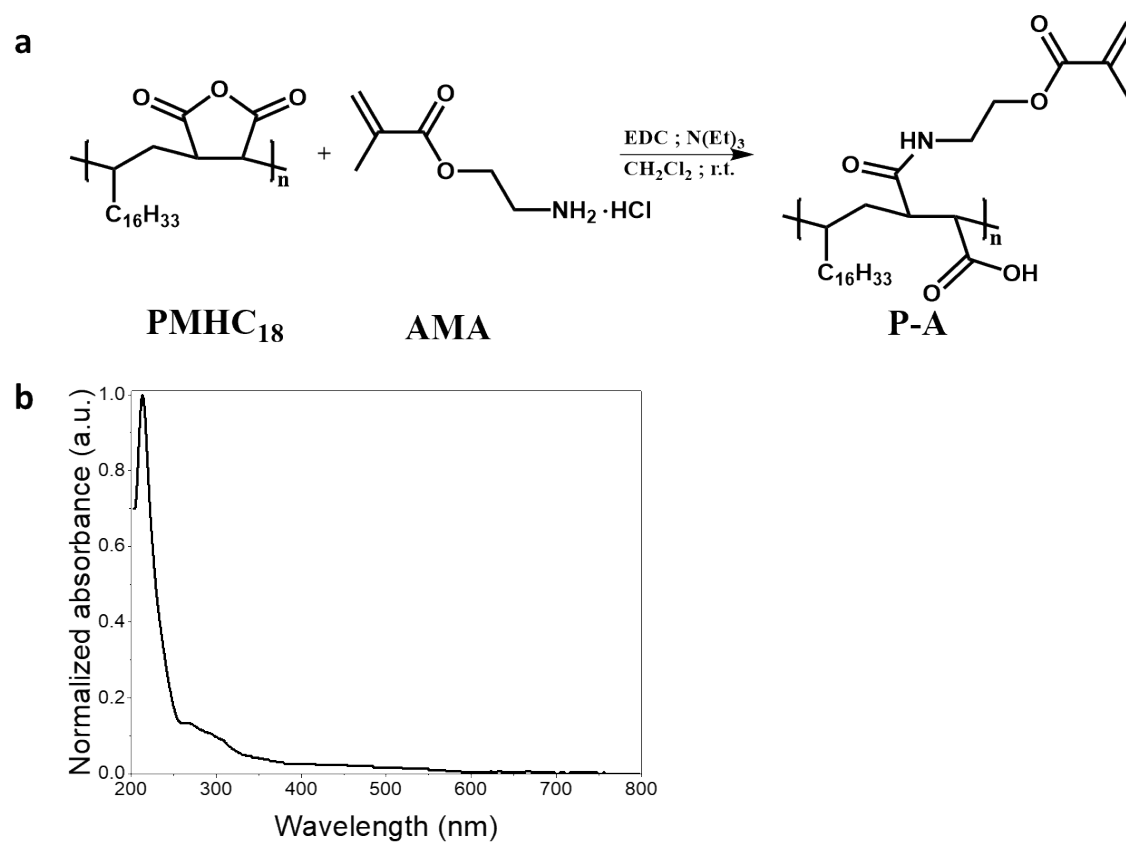

**Figure S1.** Further details of P-A. a, Chemical reaction equation. b, UV-Vis absorbance of P-A, showing an optical band gap of  $\sim 5.17$  eV.

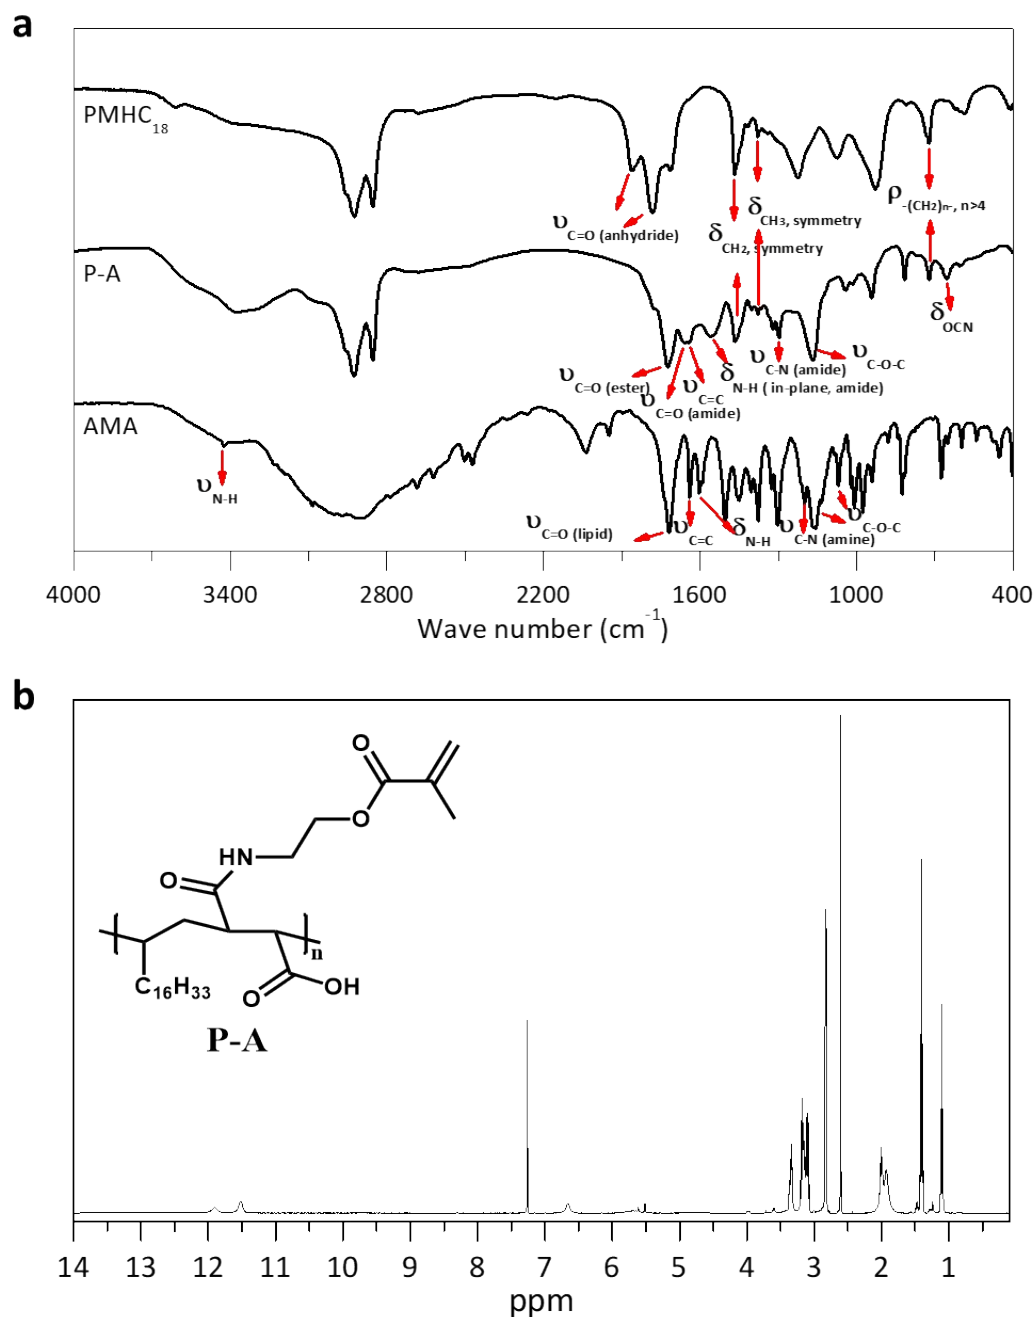

**Figure S2.** a, Fourier transform infrared spectroscopy (FTIR) of PMHC<sub>18</sub>, AMA and P-A. b, <sup>1</sup>H NMR spectra of P-A (400 MHz, CDCl<sub>3</sub>). The chemical shift signals at 11.9 ppm and 11.5 ppm came from hydrogen atoms on carboxylic acids in different chemical environments. It should be noted that active hydrogen on carboxyl and amide groups may not be detected due to heavy hydrogen exchange).

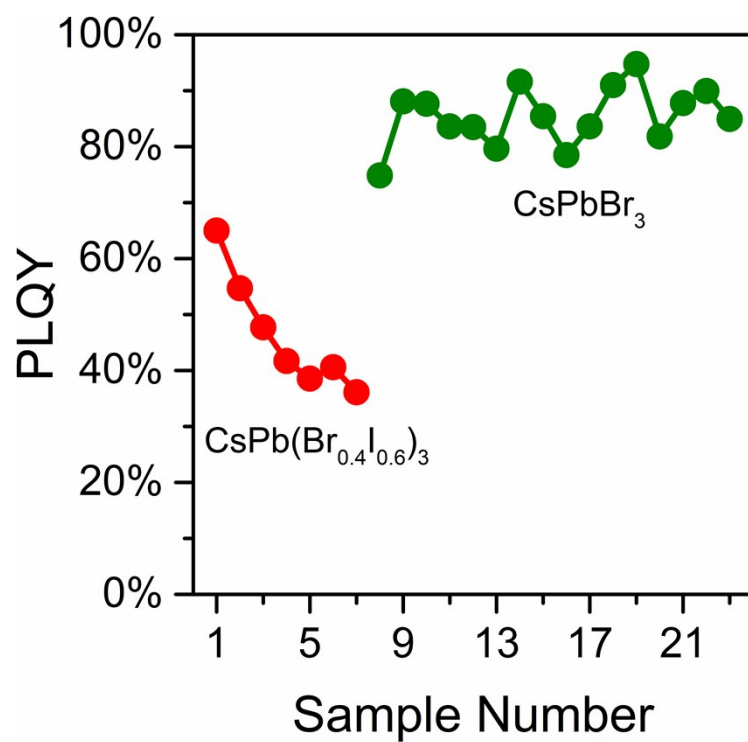

**Figure S3.** The trend of PLQY of samples.

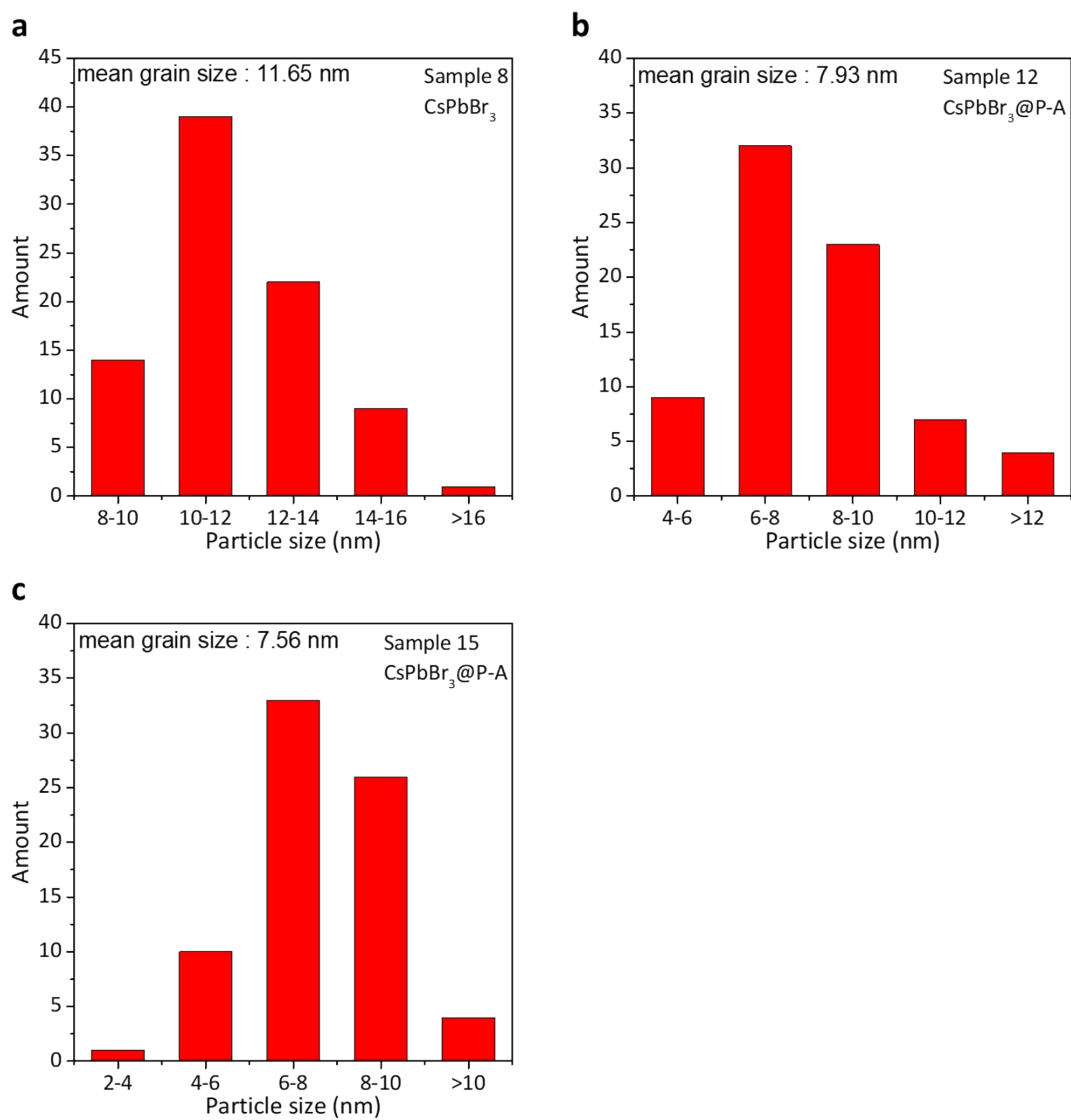

**Figure S4.** a, b, c, Size distribution histograms of Sample 8, 12 and 15 respectively.

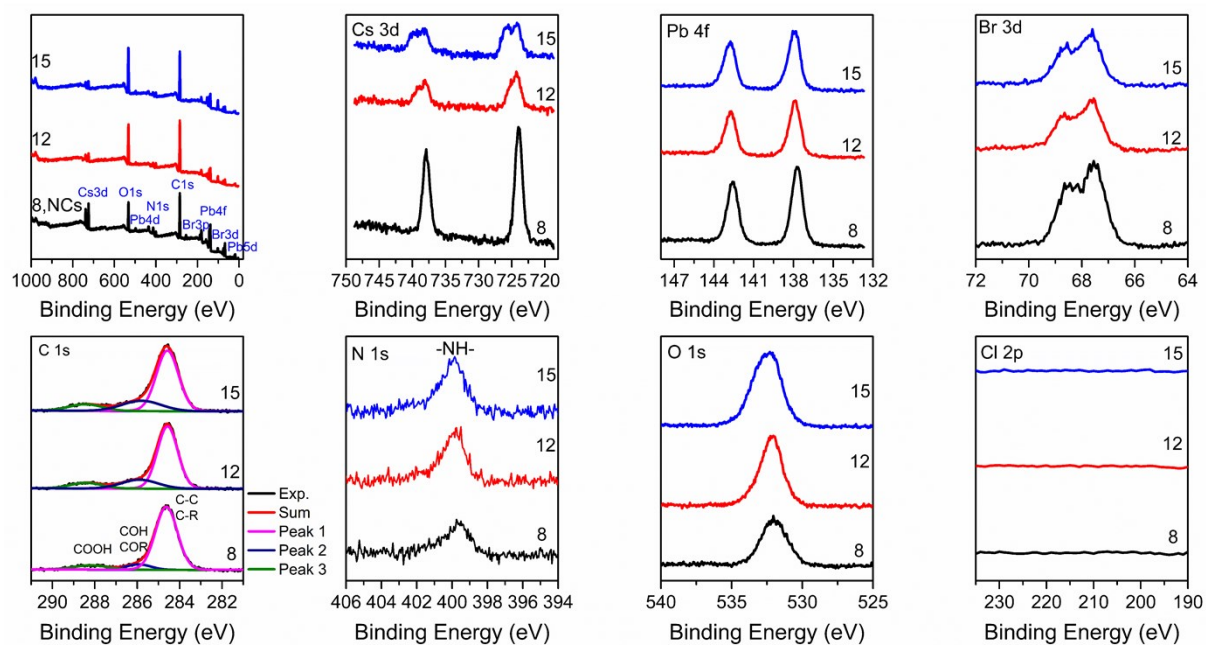

**Figure S5.** Total spectra and Cs 3d, Pb 4f, Br 3d, C 1s, N 1s, O 1s and Cl 2p core level spectra of Sample 8, 12, 15.

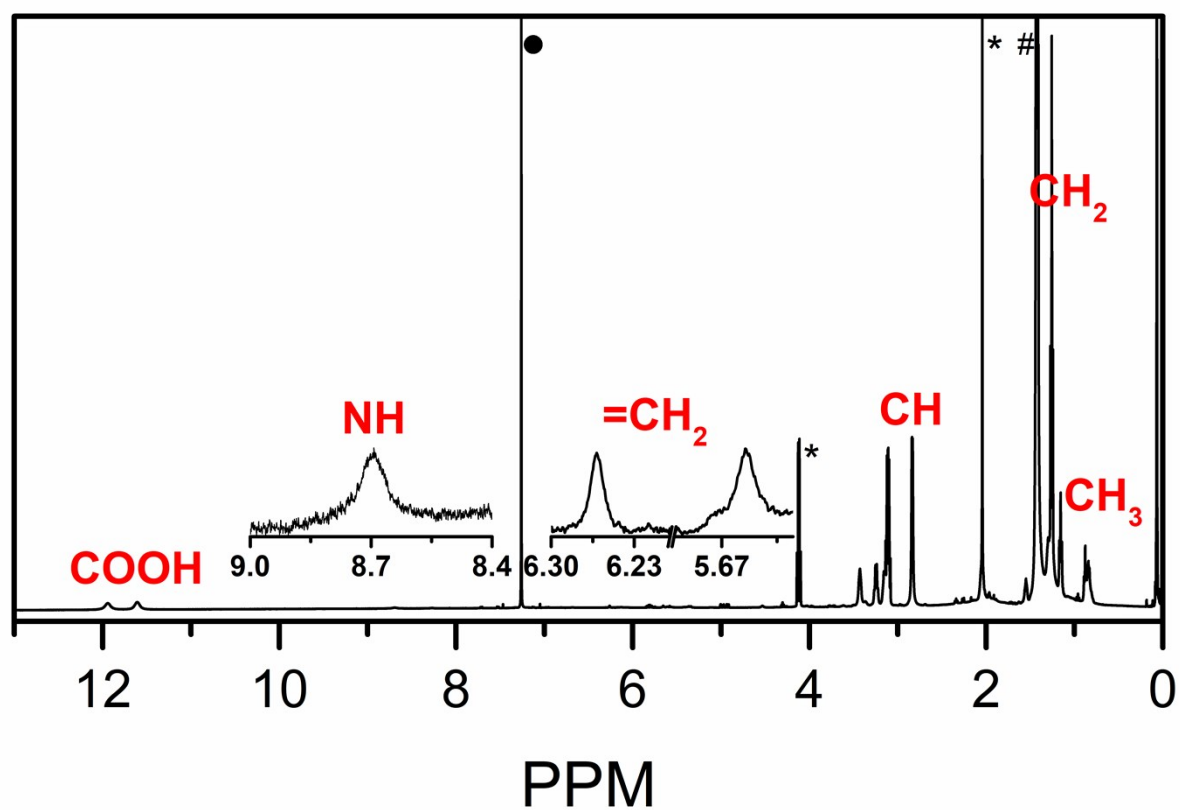

**Figure S6.**  $^1\text{H}$  NMR spectra of NCs@P-A (500 MHz,  $\text{CDCl}_3$ ). The spectrum can be assigned to the ligand P-A and solvents (\* ethyl acetate, # cyclohexane and •  $\text{CDCl}_3$ ).

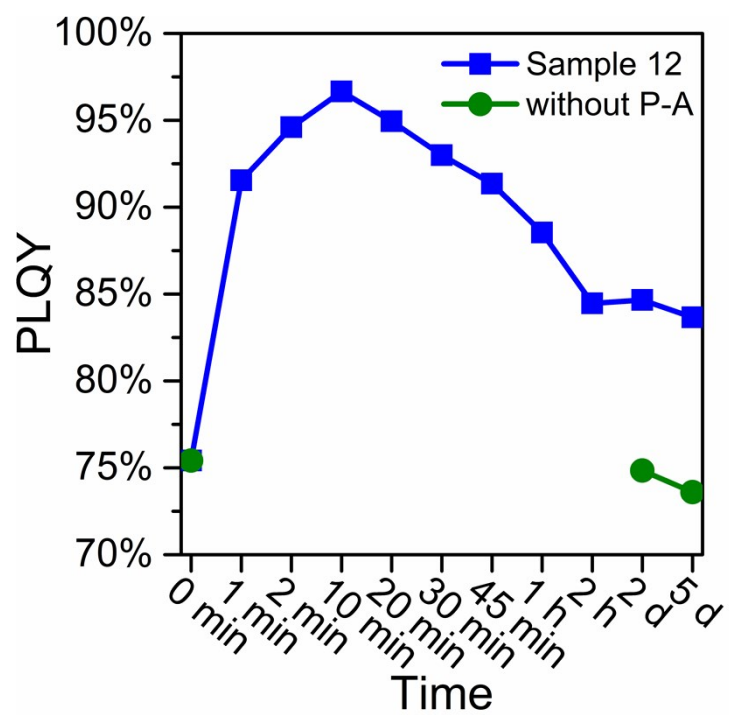

**Figure S7.** The trend of PLQY of sample 12 over time.



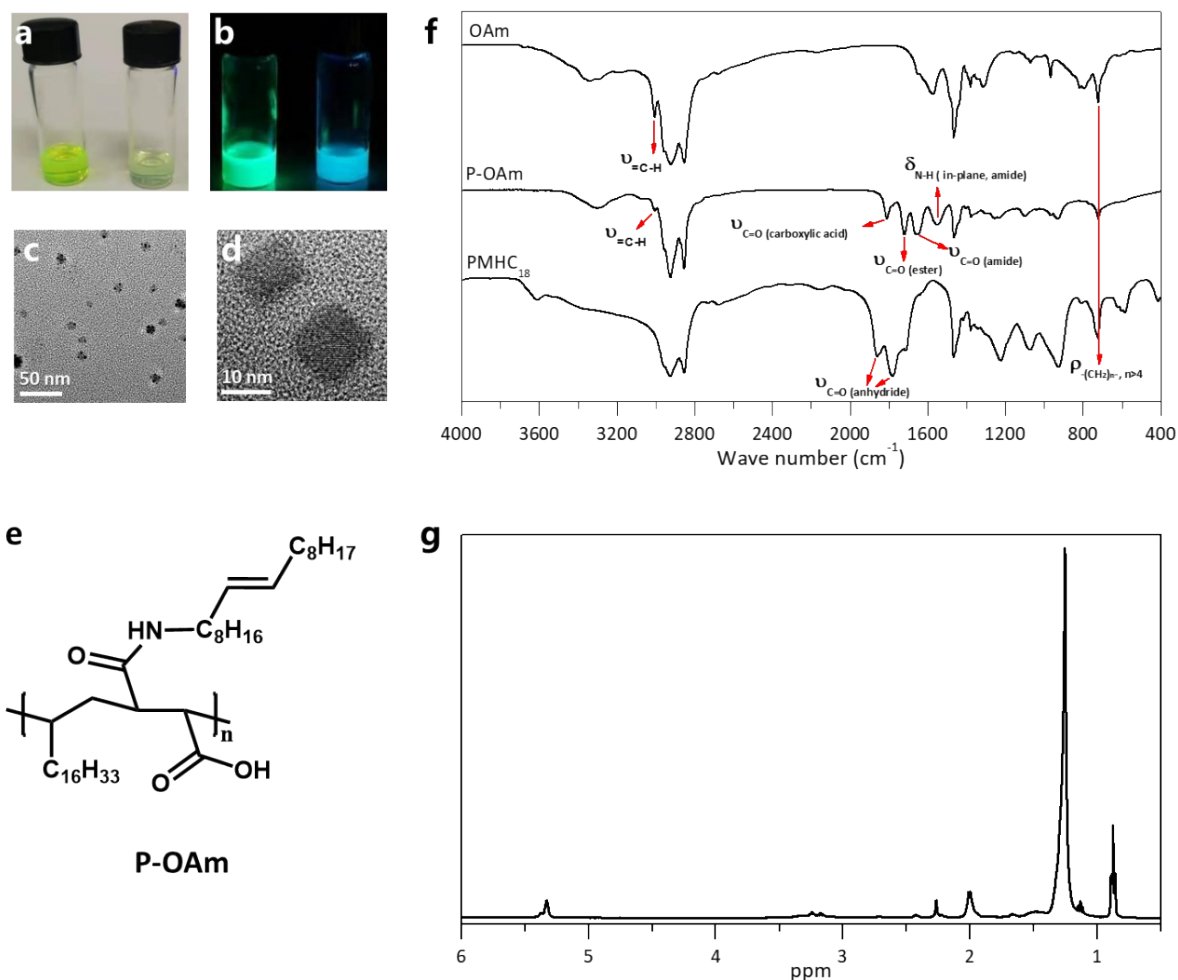

**Figure S8.** a, Photographs of CsPbBr<sub>3</sub> NCs colloidal solution (left) and CsPbBr<sub>3</sub> NCs@P-OAm solutions (right) under room light. b, Photographs of CsPbBr<sub>3</sub> NCs colloidal solution (left) and CsPbBr<sub>3</sub> NCs@P-OAm solutions (right) under UV illumination ( $\lambda_{\text{EX}} = 365$  nm). c, d, TEM images of CsPbBr<sub>3</sub>@P-OAm. e, Chemical structure of P-OAm. f, Fourier transform infrared spectroscopy (FTIR) of PMHC<sub>18</sub>, OAm and P-OAm. g, <sup>1</sup>H NMR spectra of P-OAm (400 MHz, CDCl<sub>3</sub>. It should be noted that active hydrogen on carboxyl and amide groups may not be detected due to heavy hydrogen exchange).

**Table S1.** Sample number, concentration of P-A and peak position of CsPb(Br<sub>0.4</sub>I<sub>0.6</sub>)<sub>3</sub> NCs.

| No.                                            | 1   | 2    | 3    | 4   | 5   | 6   | 7   |
|------------------------------------------------|-----|------|------|-----|-----|-----|-----|
| Concentration of P-A ( $\times 10^{-3}$ mg/ml) | 0   | 62.5 | 83.3 | 125 | 250 | 500 | 625 |
| Peak position (nm)                             | 646 | 634  | 630  | 622 | 611 | 609 | 551 |

**Table S2.** Sample number, concentration of P-A and peak position of CsPbBr<sub>3</sub> NCs.

| No.                                            | 8   | 9   | 10  | 11  | 12  | 13  | 14  | 15  | 16  | 17  | 18  | 19  | 20  | 21  | 22  | 23  |
|------------------------------------------------|-----|-----|-----|-----|-----|-----|-----|-----|-----|-----|-----|-----|-----|-----|-----|-----|
| Concentration of P-A ( $\times 10^{-3}$ mg/ml) | 0   | 5   | 10  | 15  | 20  | 25  | 30  | 35  | 40  | 45  | 50  | 55  | 60  | 65  | 70  | 75  |
| Peak position (nm)                             | 519 | 514 | 506 | 501 | 497 | 491 | 484 | 481 | 476 | 472 | 464 | 460 | 457 | 452 | 449 | 446 |

**Table S3.** PL lifetime of sample 12 with time goes by. The monitored wavelength was the peak position. The PL decay curves have a tri-exponential form to investigate the exciton dynamics in the tailoring process. The intensity-weighted average exciton lifetime ( $\tau_{avr}$ ) was  $f_1\tau_1 + f_2\tau_2 + f_3\tau_3$ , where  $f_1$ ,  $f_2$  and  $f_3$  are fractional intensities and  $\tau_1$ ,  $\tau_2$  and  $\tau_3$  are lifetimes.

| time   | $\tau_1/\text{ns}$ ( $f_1$ ) | $\tau_2/\text{ns}$ ( $f_2$ ) | $\tau_3/\text{ns}$ ( $f_3$ ) | $R^2$  | $\tau_{avr}/\text{ns}$ |
|--------|------------------------------|------------------------------|------------------------------|--------|------------------------|
| 0 min  | 2.18 (0.08)                  | 8.10 (0.54)                  | 28.32 (0.38)                 | 0.9984 | 15.36                  |
| 2 min  | 4.04 (0.14)                  | 12.07 (0.55)                 | 36.50 (0.31)                 | 0.9985 | 18.55                  |
| 10 min | 1.48 (0.03)                  | 8.24 (0.47)                  | 27.74 (0.50)                 | 0.9984 | 17.70                  |
| 20 min | 1.29 (0.03)                  | 7.95 (0.48)                  | 27.12 (0.49)                 | 0.9985 | 17.13                  |
| 30 min | 1.23 (0.03)                  | 7.69 (0.48)                  | 26.48 (0.49)                 | 0.9984 | 16.79                  |
| 45 min | 1.58 (0.03)                  | 8.36 (0.52)                  | 28.47 (0.45)                 | 0.9984 | 17.24                  |
| 1 h    | 2.44 (0.06)                  | 8.47 (0.51)                  | 27.97 (0.43)                 | 0.9983 | 16.57                  |
| 2 h    | 1.75 (0.04)                  | 7.93 (0.50)                  | 26.66 (0.46)                 | 0.9984 | 16.23                  |
| 5 d    | 1.49 (0.06)                  | 8.31 (0.49)                  | 33.04 (0.45)                 | 0.9982 | 19.19                  |

**Table S4.** The reactants and other polymers with amide and, or carboxylic acid bonds that added into the LHP NCs colloid solutions, the red cross means no, and the green hook means band gap adjustment.

| Chemicals                                             | Chemical structure                                                                   | × or ✓ |
|-------------------------------------------------------|--------------------------------------------------------------------------------------|--------|
| AMA                                                   | 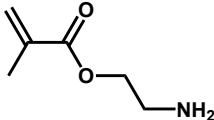   | ×      |
| PMHC <sub>18</sub>                                    |    | ×      |
| PMHC <sub>18</sub> hydrolytic product                 |   | ×      |
| EDC                                                   |  | ×      |
|                                                       |  | ×      |
| polyethylene glycol                                   |  | ×      |
|                                                       |  | ×      |
| polyacrylic acid                                      |  | ×      |
| polyacrylamide                                        |  | ×      |
| polyacrylamide + polyacrylic acid                     | —                                                                                    | ×      |
| [HOOC(-O-C-C-) <sub>n</sub> COOH] +<br>polyacrylamide | —                                                                                    | ×      |
| P-A                                                   |  | ✓      |

| Chemicals | Chemical structure                                                                 | ✗ or ✓ |
|-----------|------------------------------------------------------------------------------------|--------|
| P-OAm     | 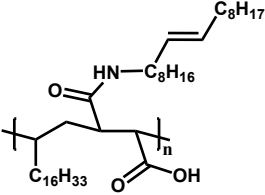 | ✓      |
